# Supplementary figures and images for: Bevacizumab-Induced Thrombotic Microangiopathy (TMA) in Metastatic Lung Adenocarcinoma Patients Receiving Nivolumab Combined with Bevacizumab, Carboplatin and Paclitaxel: Two Case Reports
Source: MDPI journal article supplement (doi:10.3390/clinpract13010018), 2023-01-30

Figure S1. Kidney ultrasonography of 2 study patients. (A) Patient #1 (B) Patient #2.

A.

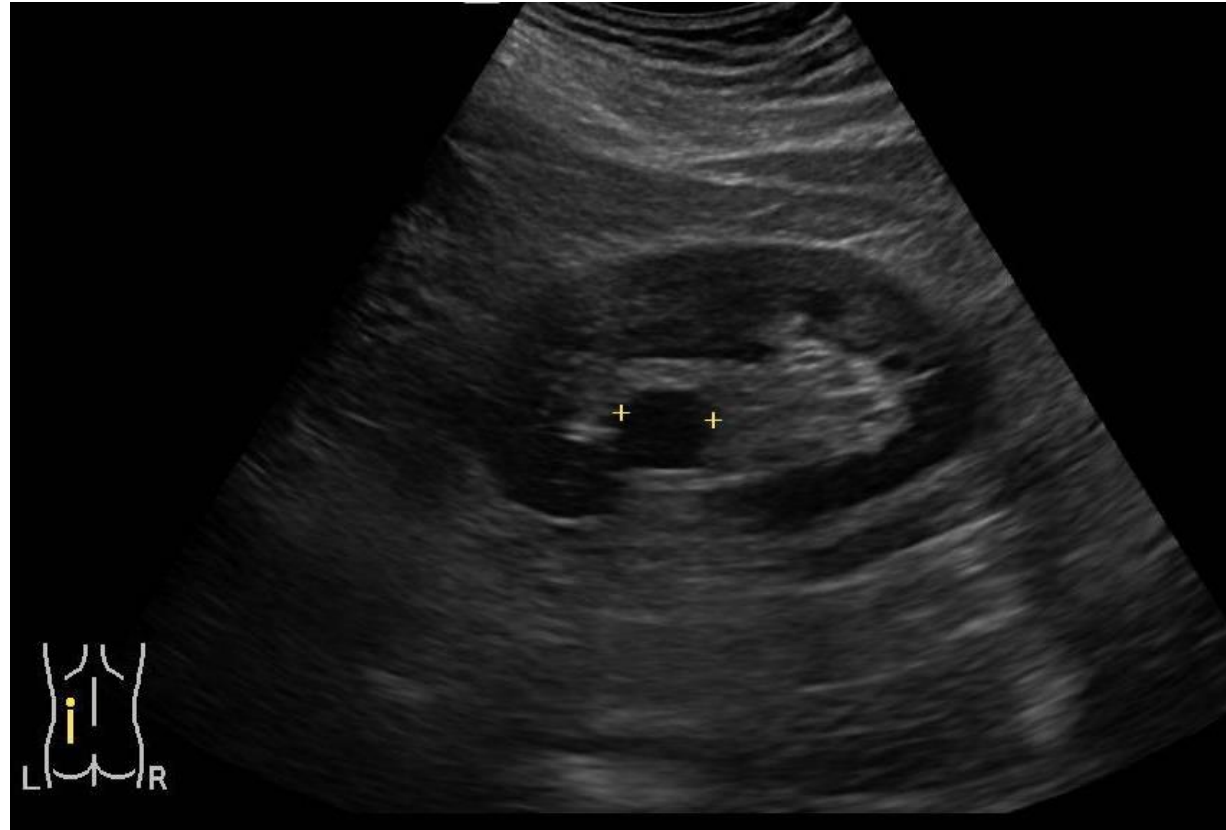

B.

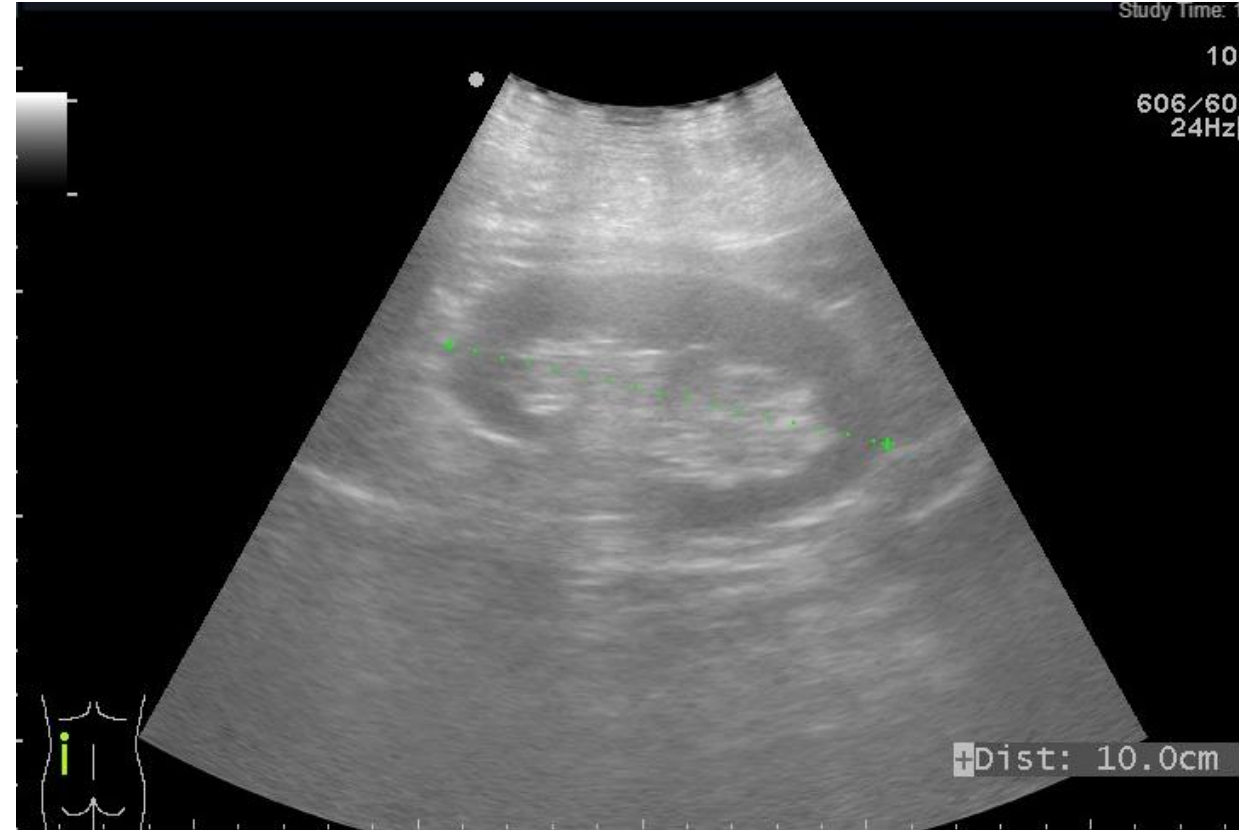

Supplement: s1 [file s1]
